# Supplementary figures and images for: Pupil diameter encodes the idiosyncratic, cognitive complexity of belief updating
Source: eLife journal article supplement (doi:10.7554/elife.57872), 2020-05-18

Pupil Diameter (z-score)

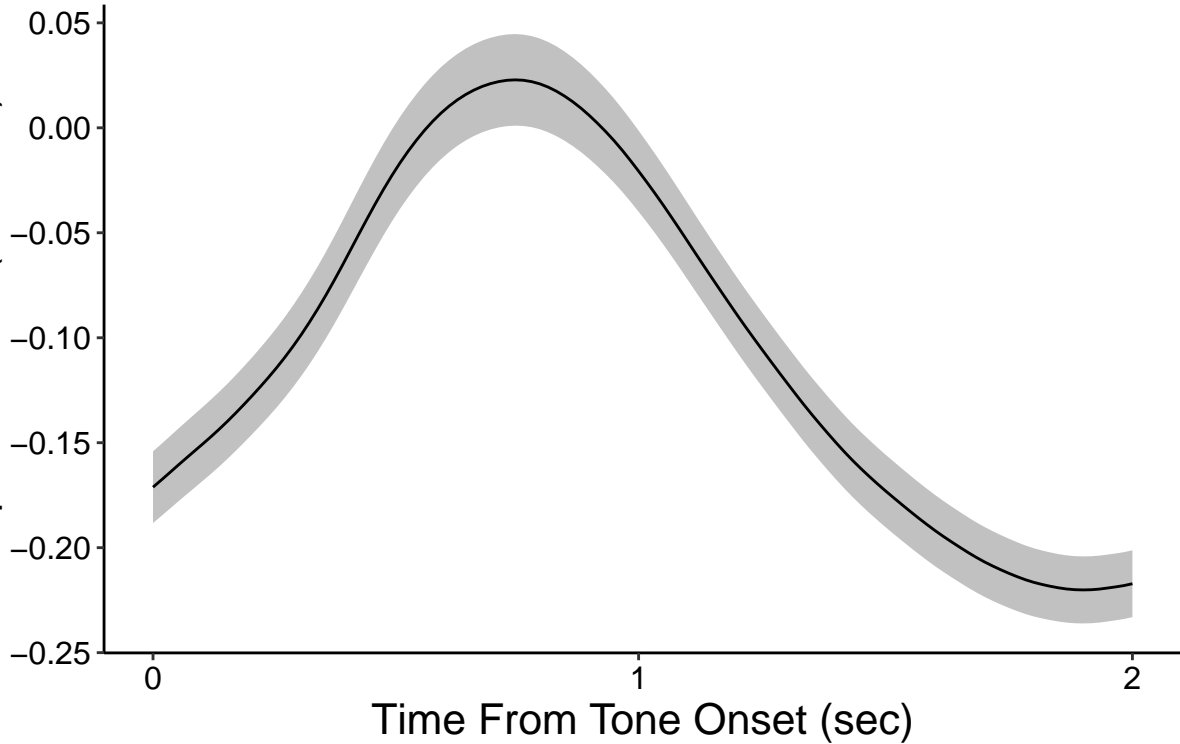

Supplement: supp [file elife_poa_e57872_Figure_2_figure_supplement_1.pdf › elife_poa_e57872_Figure_2_figure_supplement_1.pdf]

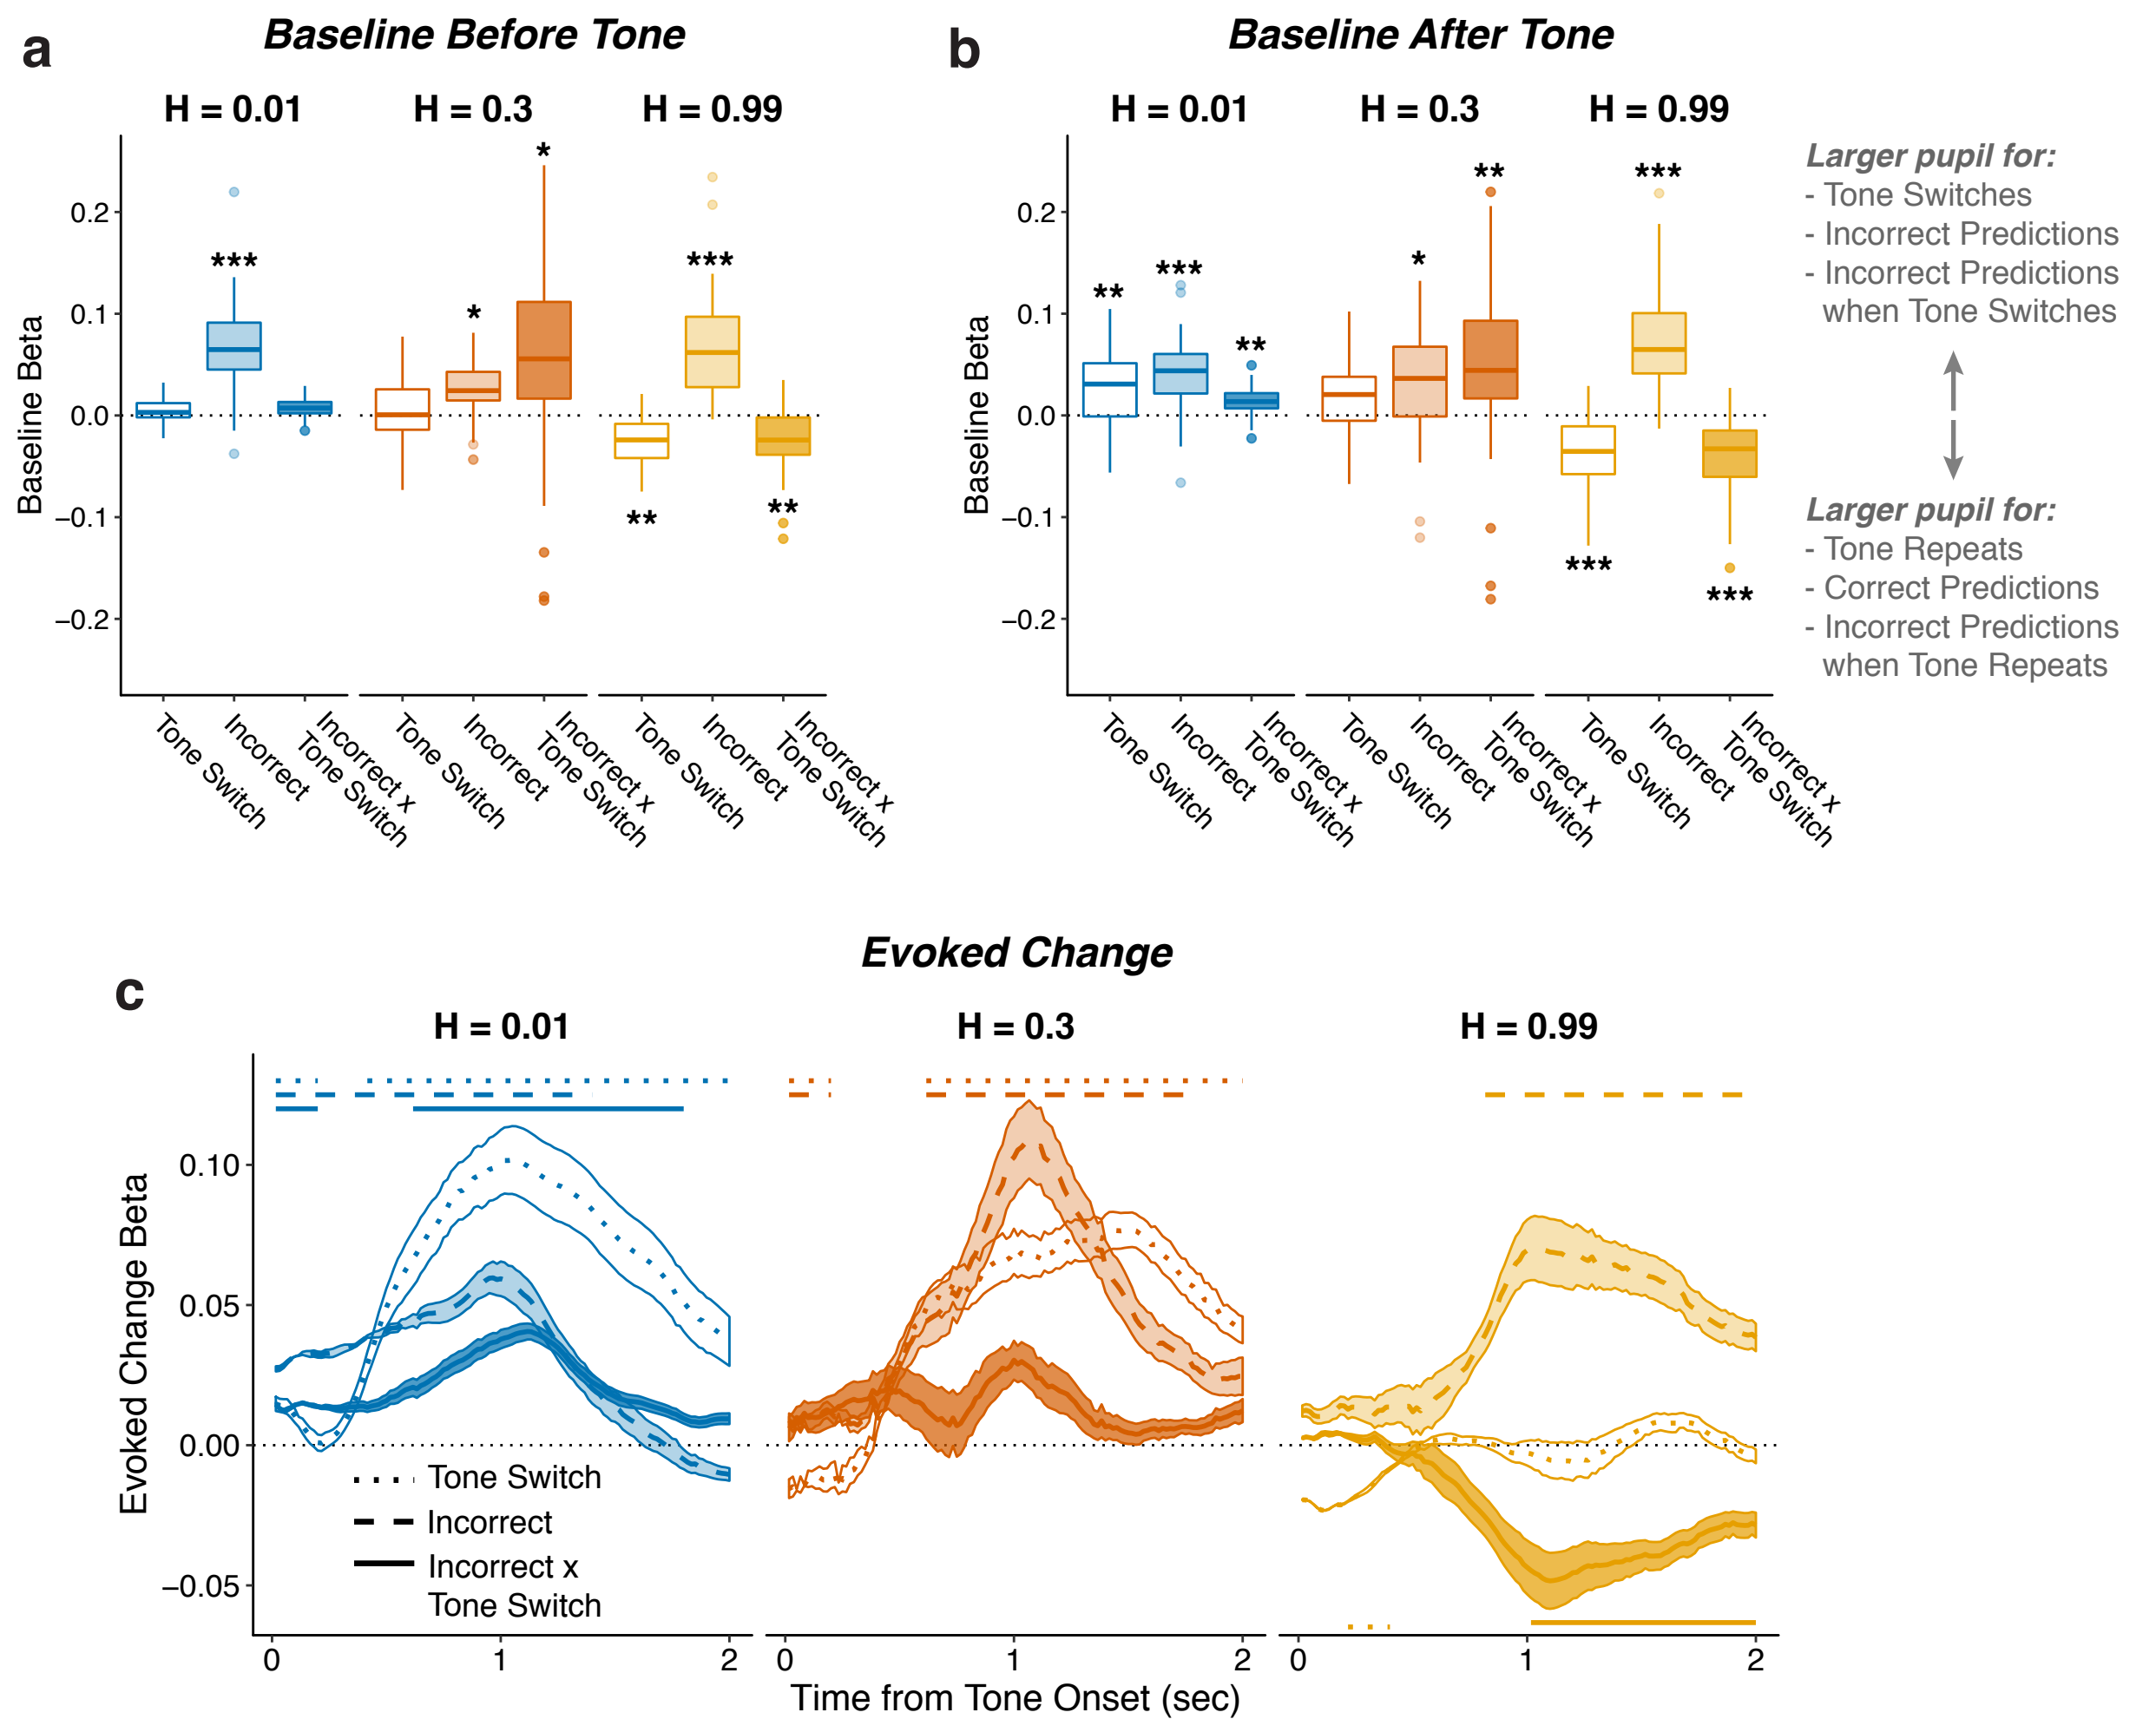

Supplement: supp [file elife_poa_e57872_Figure_2_figure_supplement_2.pdf › elife_poa_e57872_Figure_2_figure_supplement_2.pdf]

**a***Wide Prior*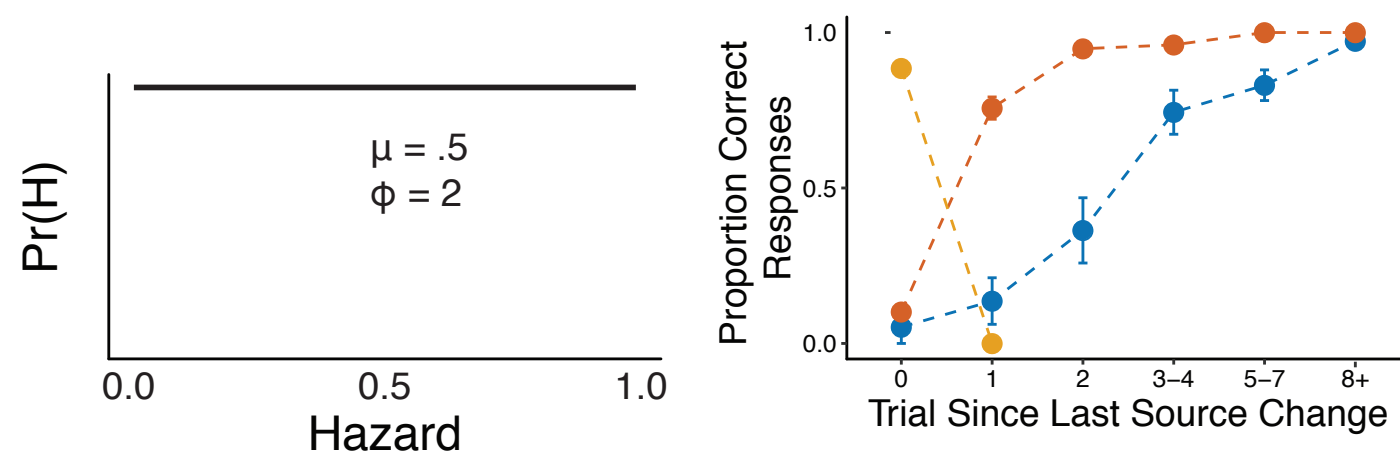*Narrow Prior*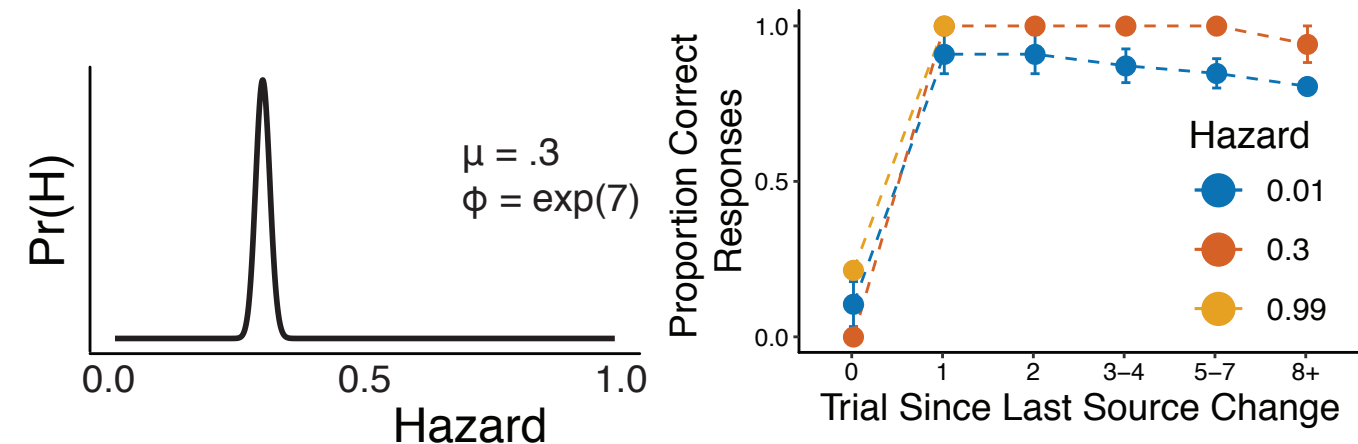**b***Average Subject Prior*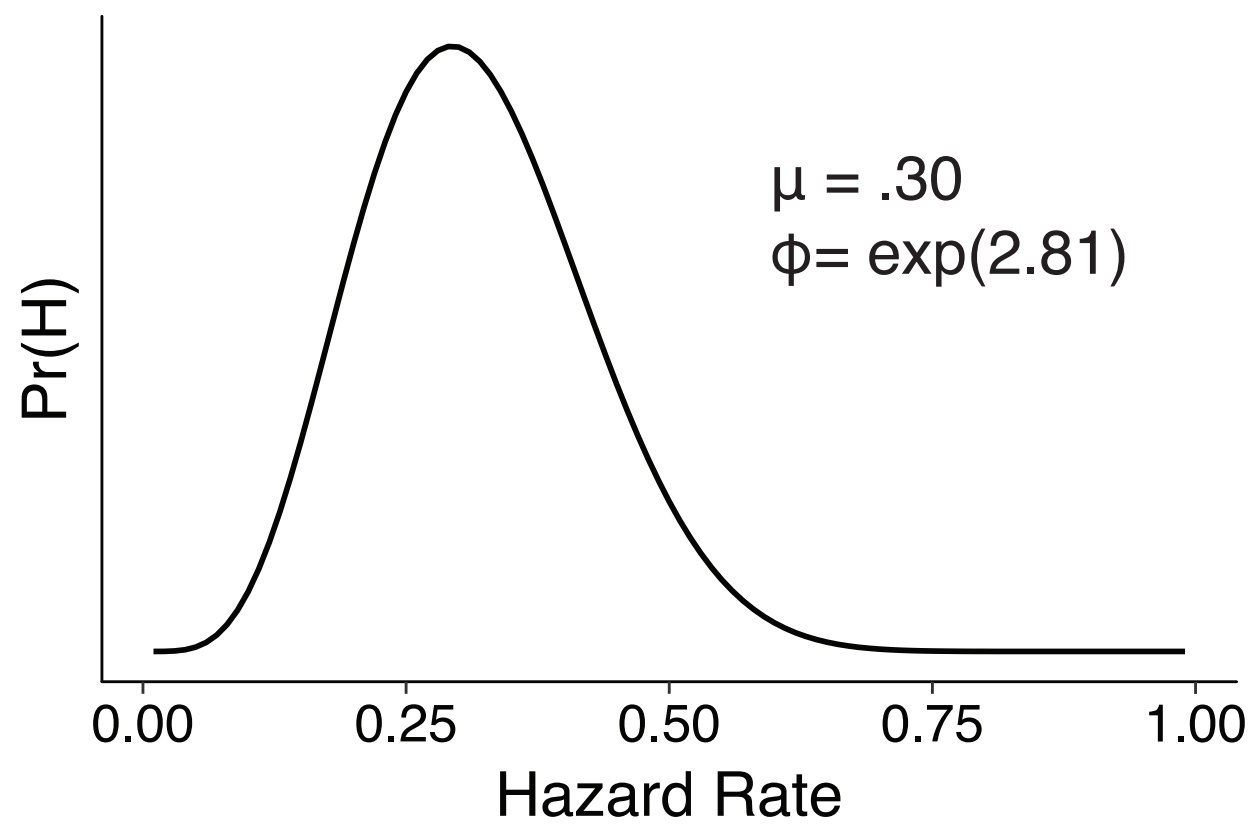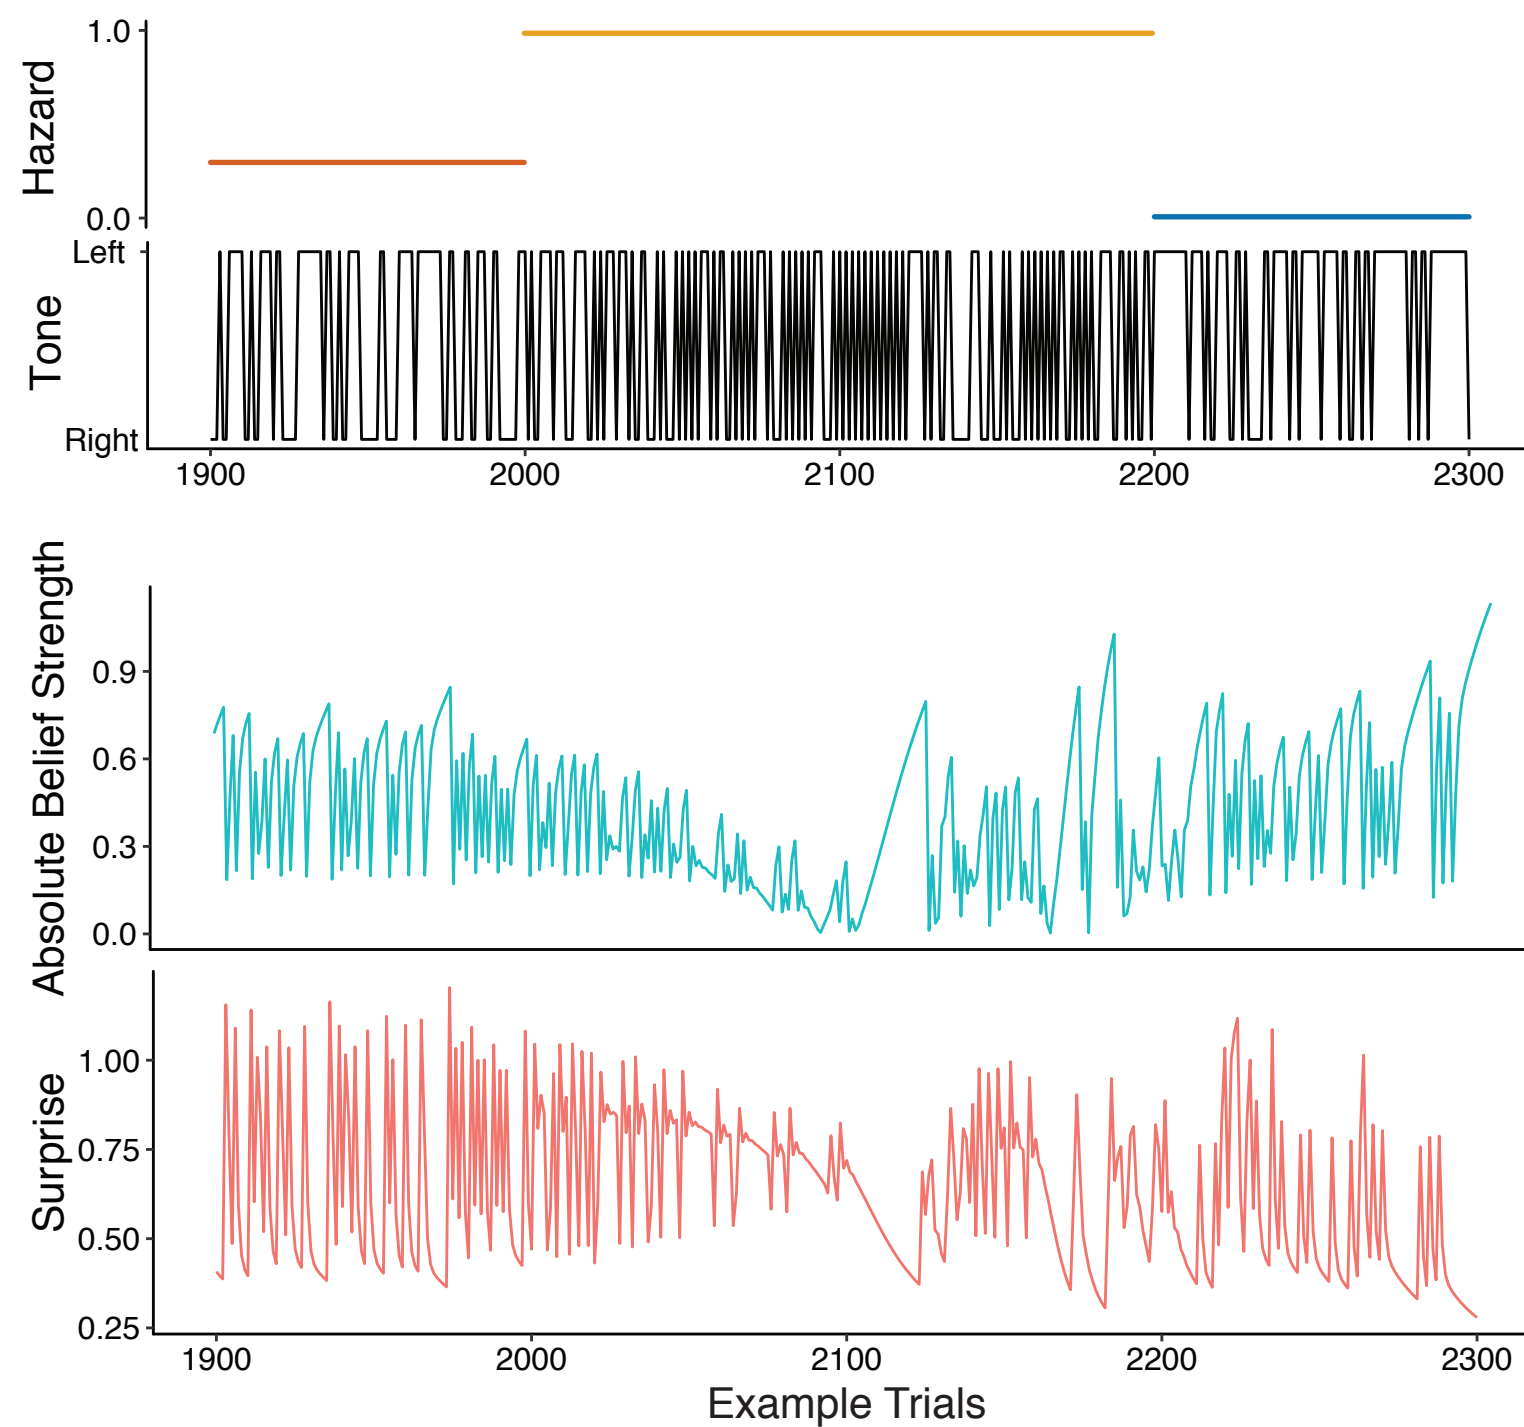

Supplement: supp [file elife_poa_e57872_Figure_3_figure_supplement_1.pdf › elife_poa_e57872_Figure_3_figure_supplement_1.pdf]

Pupil Derivative Beta Weight

$H = 0.01$

$H = 0.3$

$H = 0.99$

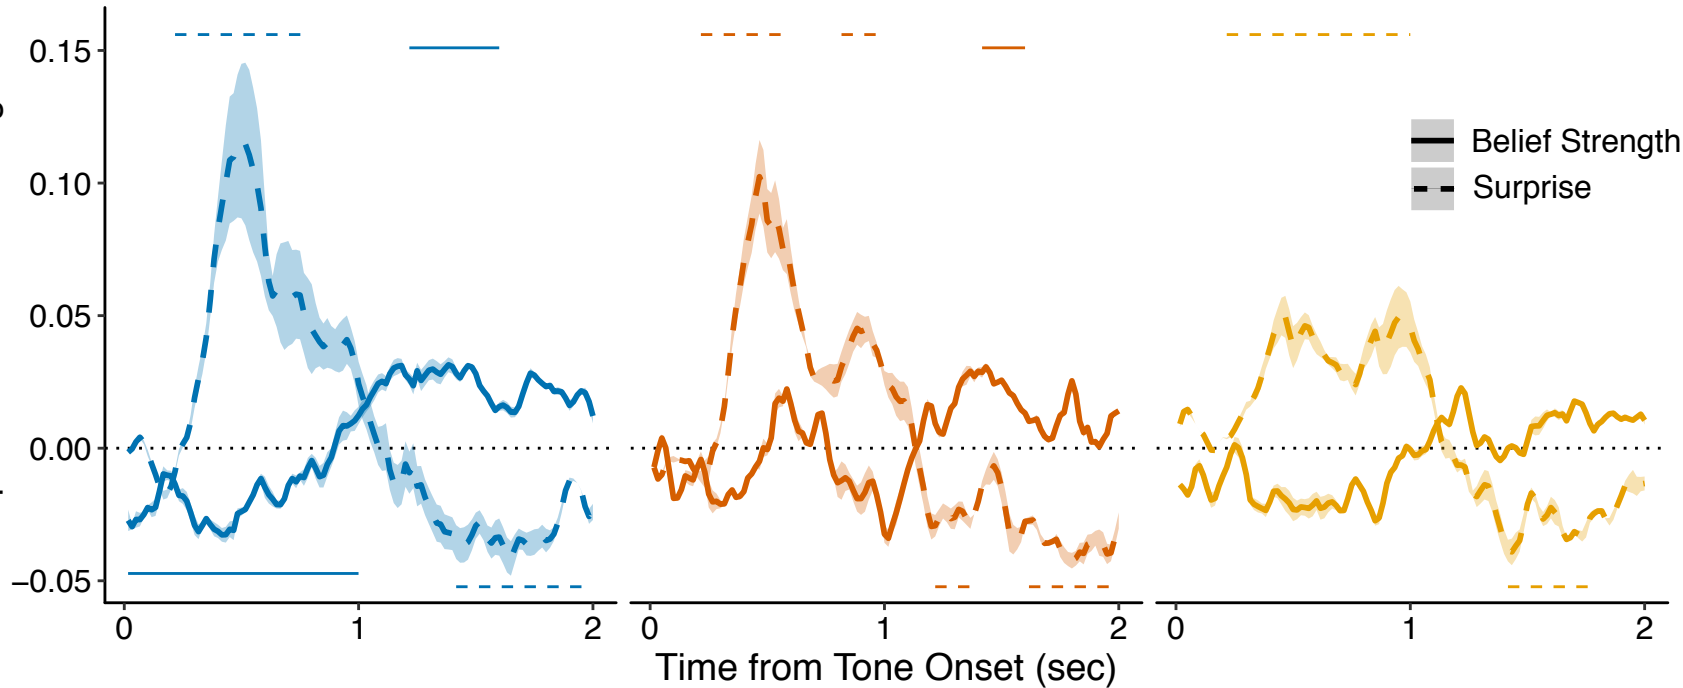

Supplement: supp [file elife_poa_e57872_Figure_3_figure_supplement_2.pdf › elife_poa_e57872_Figure_3_figure_supplement_2.pdf]

***Baseline***  
***accounting for  $\log(RT)$***

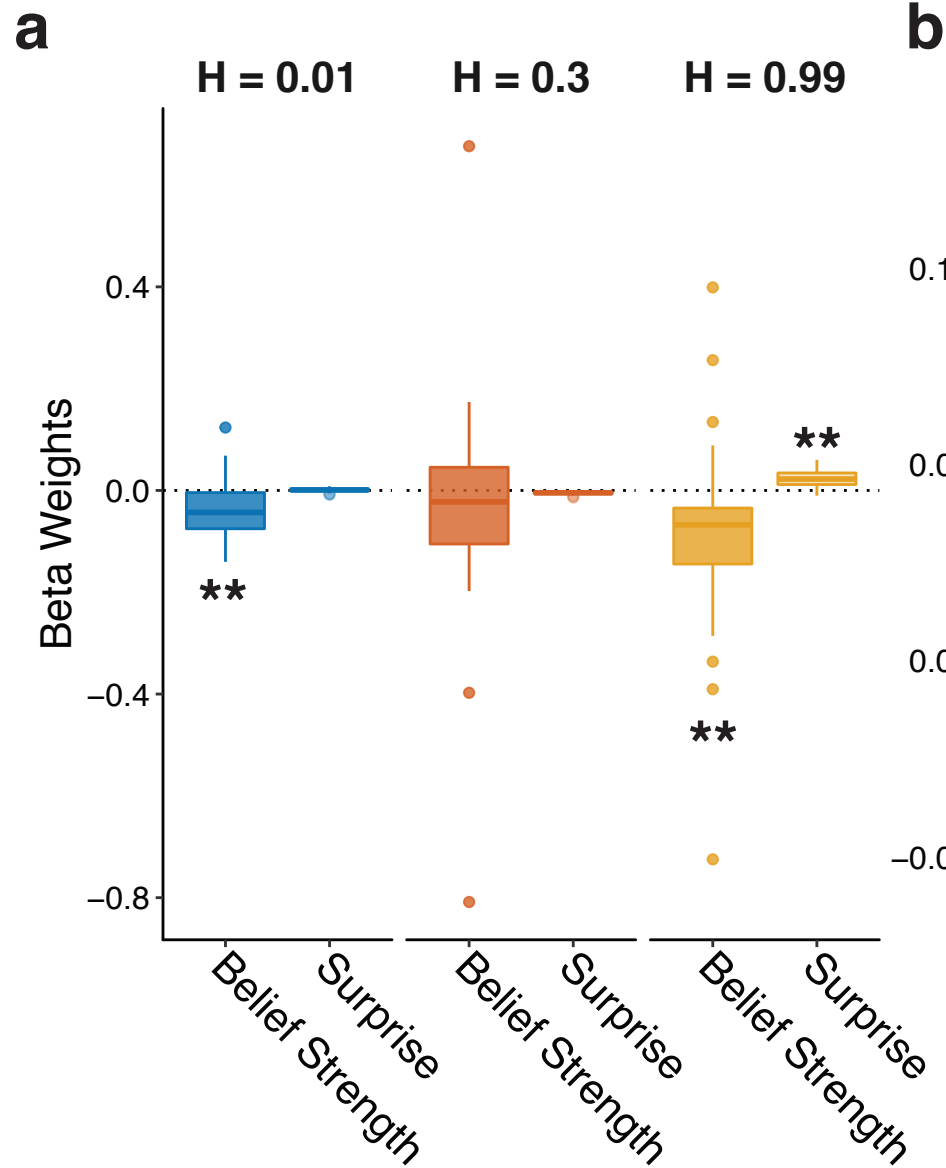

***Evoked Change***  
***accounting for Next  $\log(RT)$***

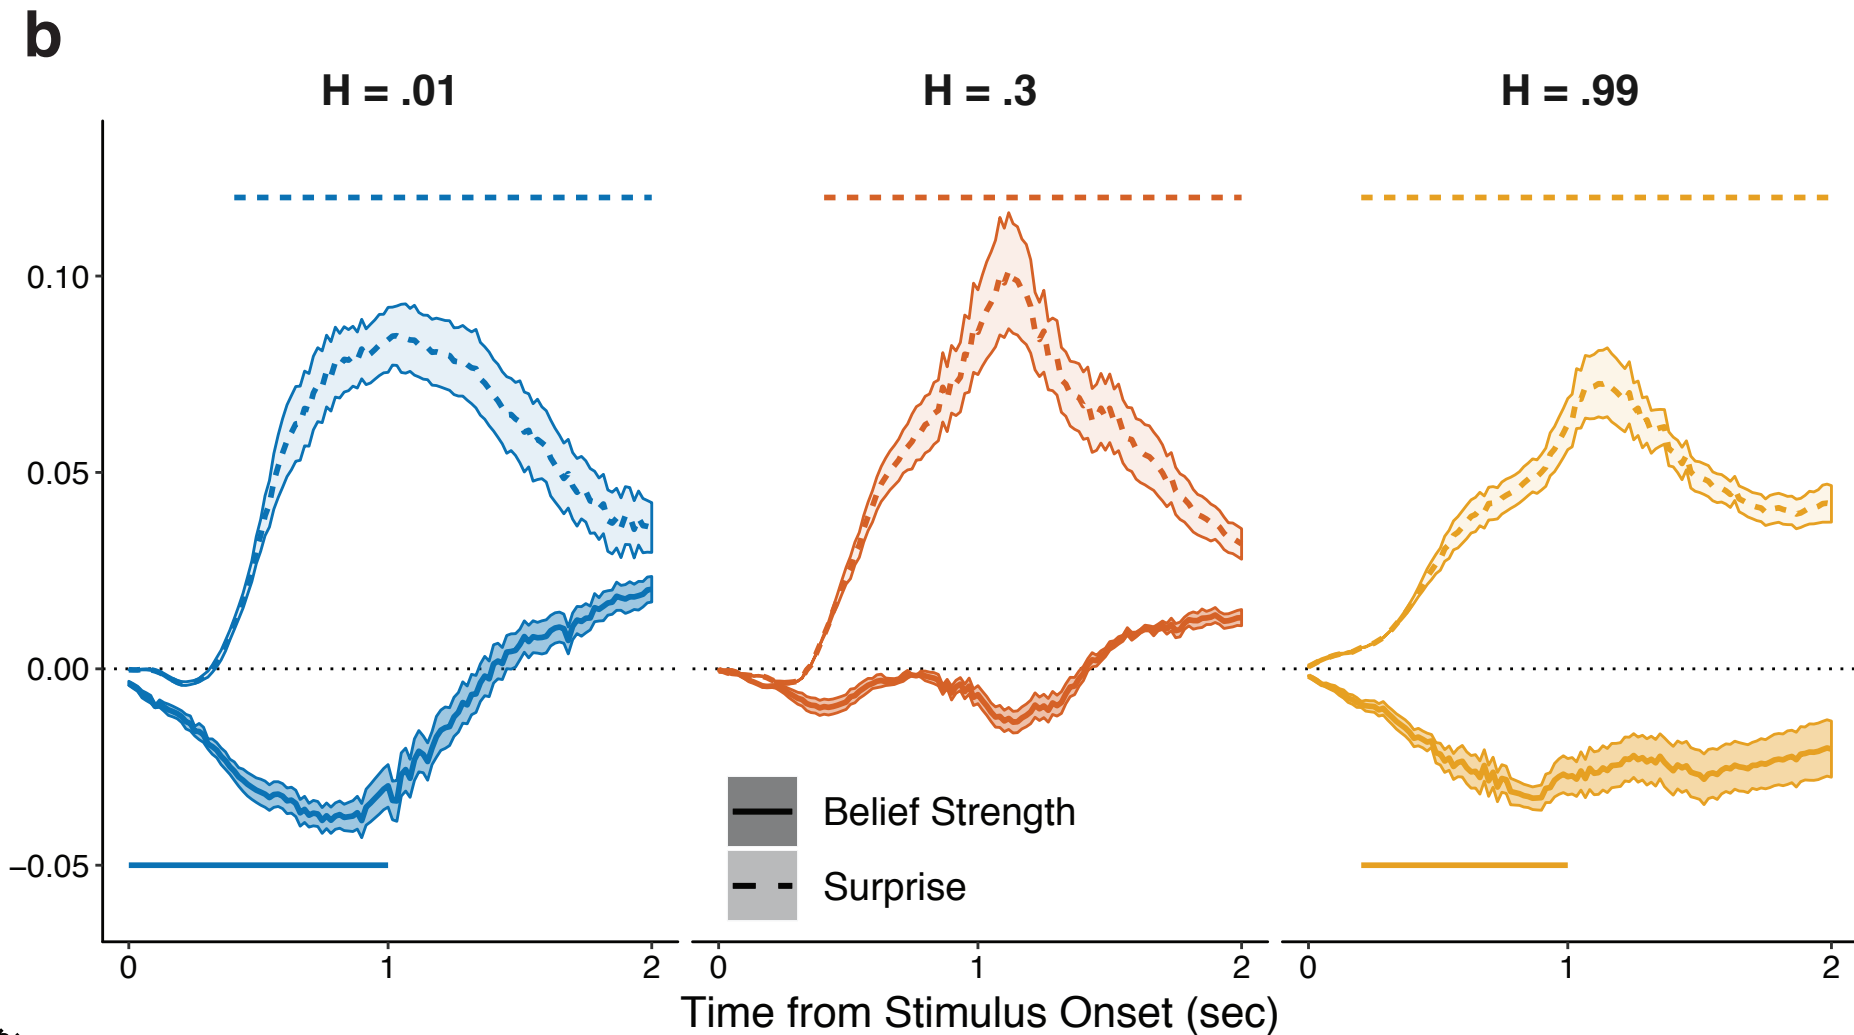

Supplement: supp [file elife_poa_e57872_Figure_3_figure_supplement_3.pdf › elife_poa_e57872_Figure_3_figure_supplement_3.pdf]

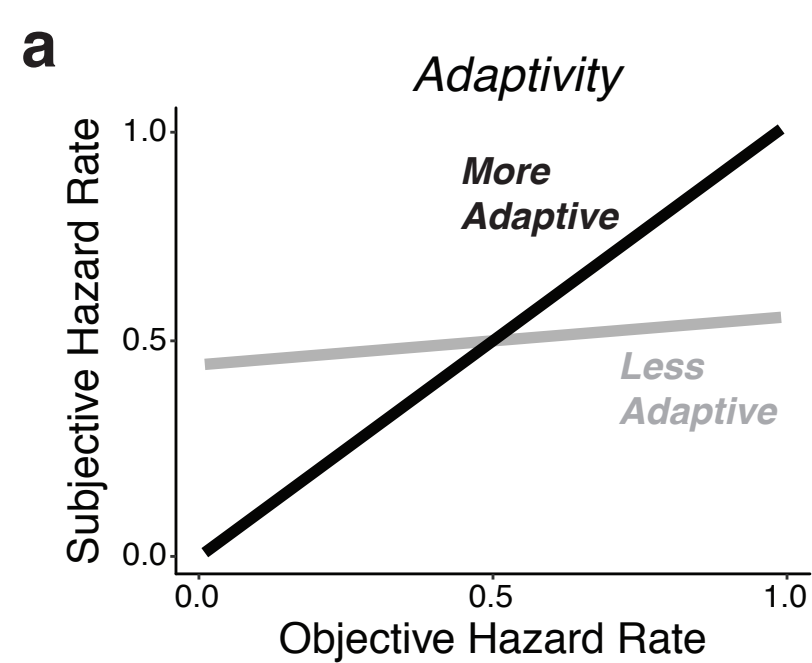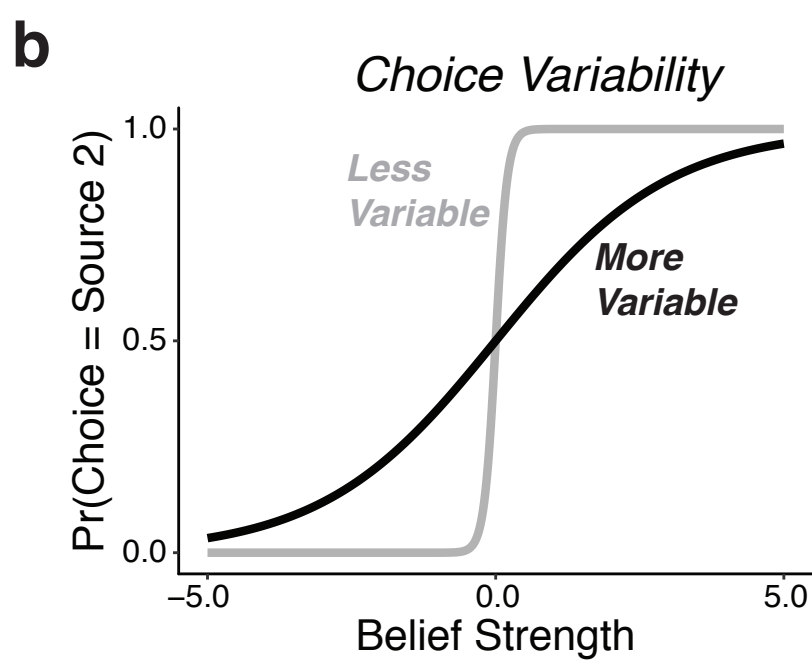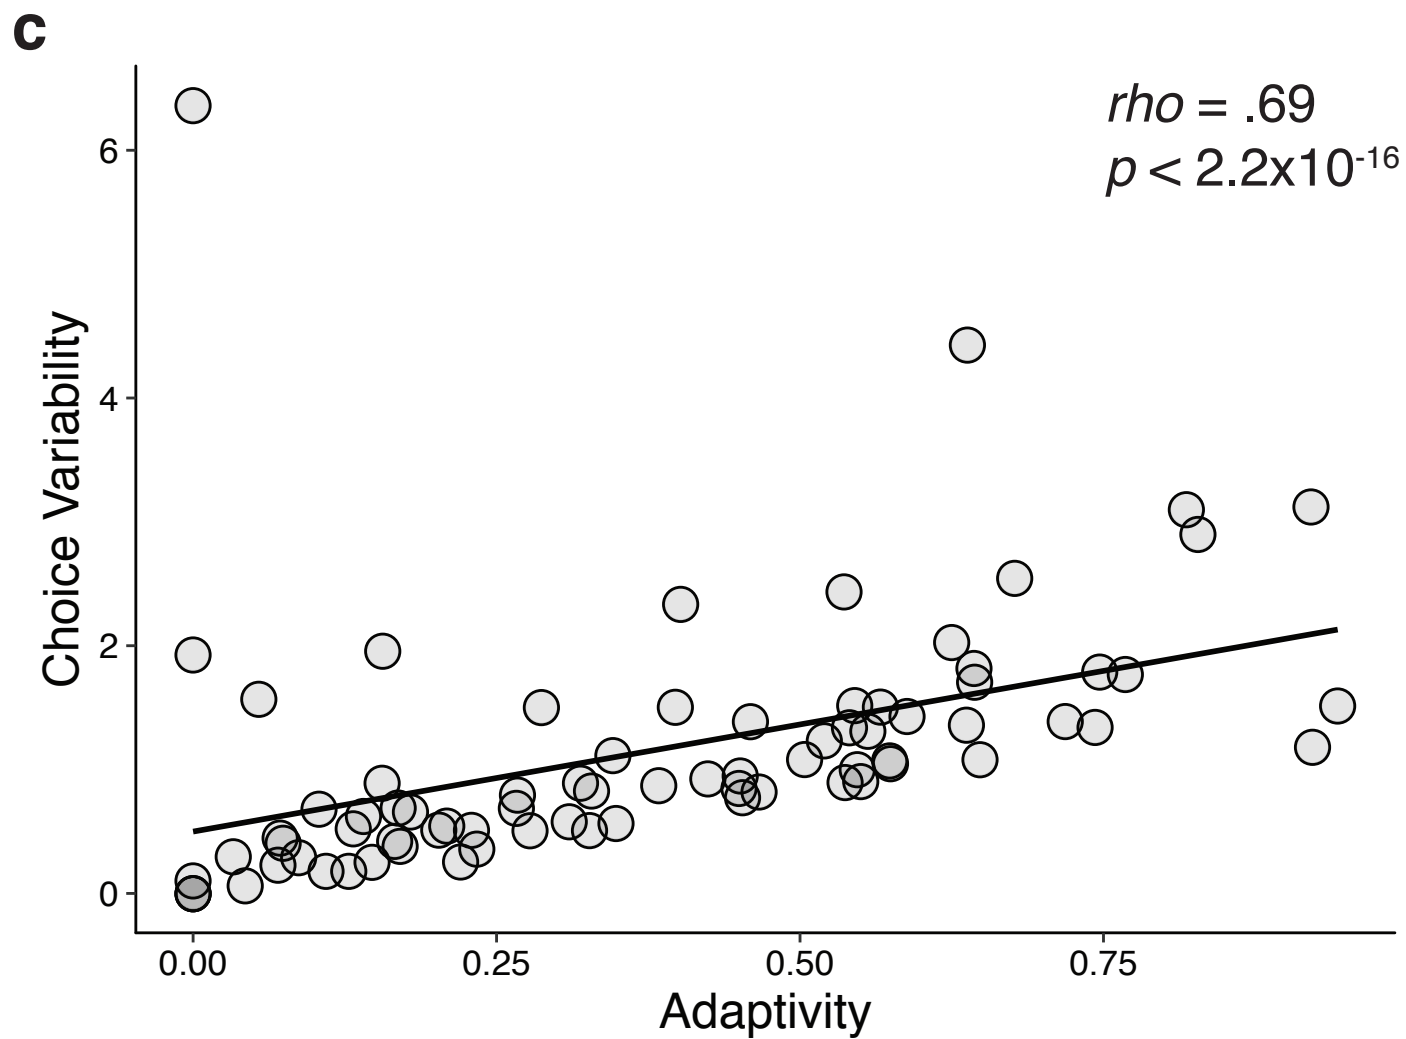

Supplement: supp [file elife_poa_e57872_Figure_4_figure_supplement_1.pdf › elife_poa_e57872_Figure_4_figure_supplement_1.pdf]

# Adaptivity Model Parameter Recovery

**a**

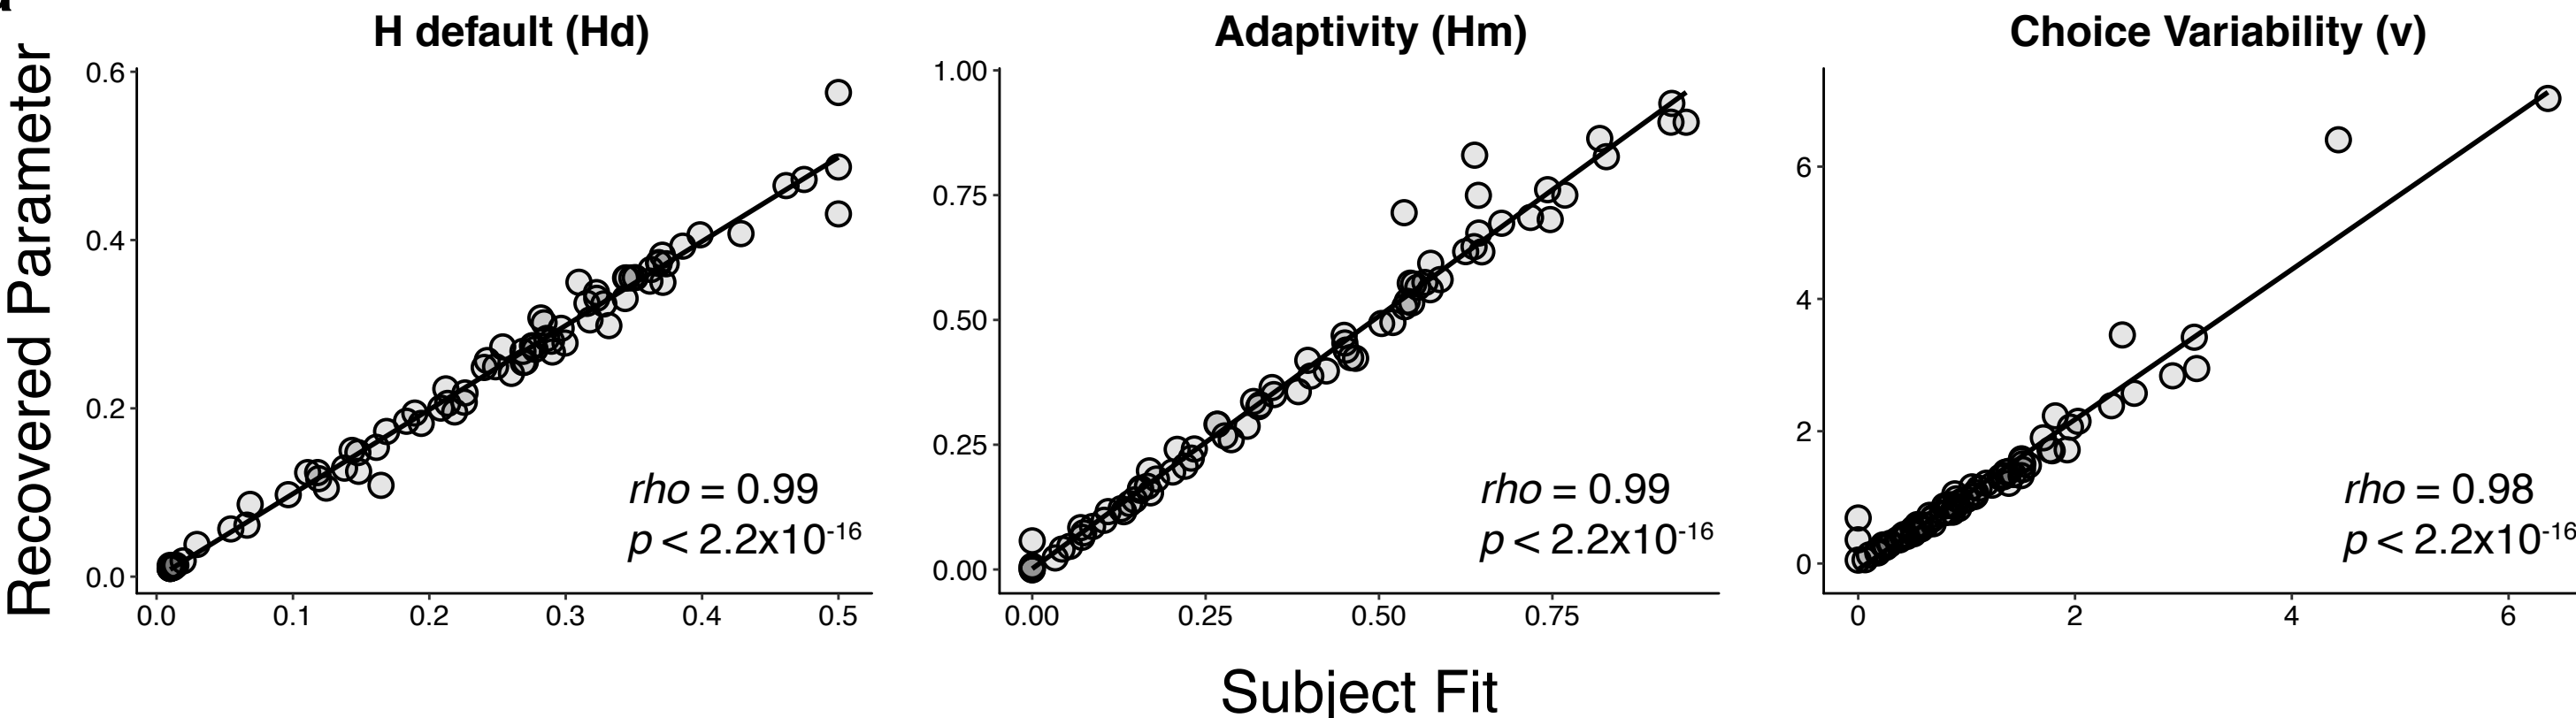

# Bayesian Learning Model Parameter Recovery

**b**

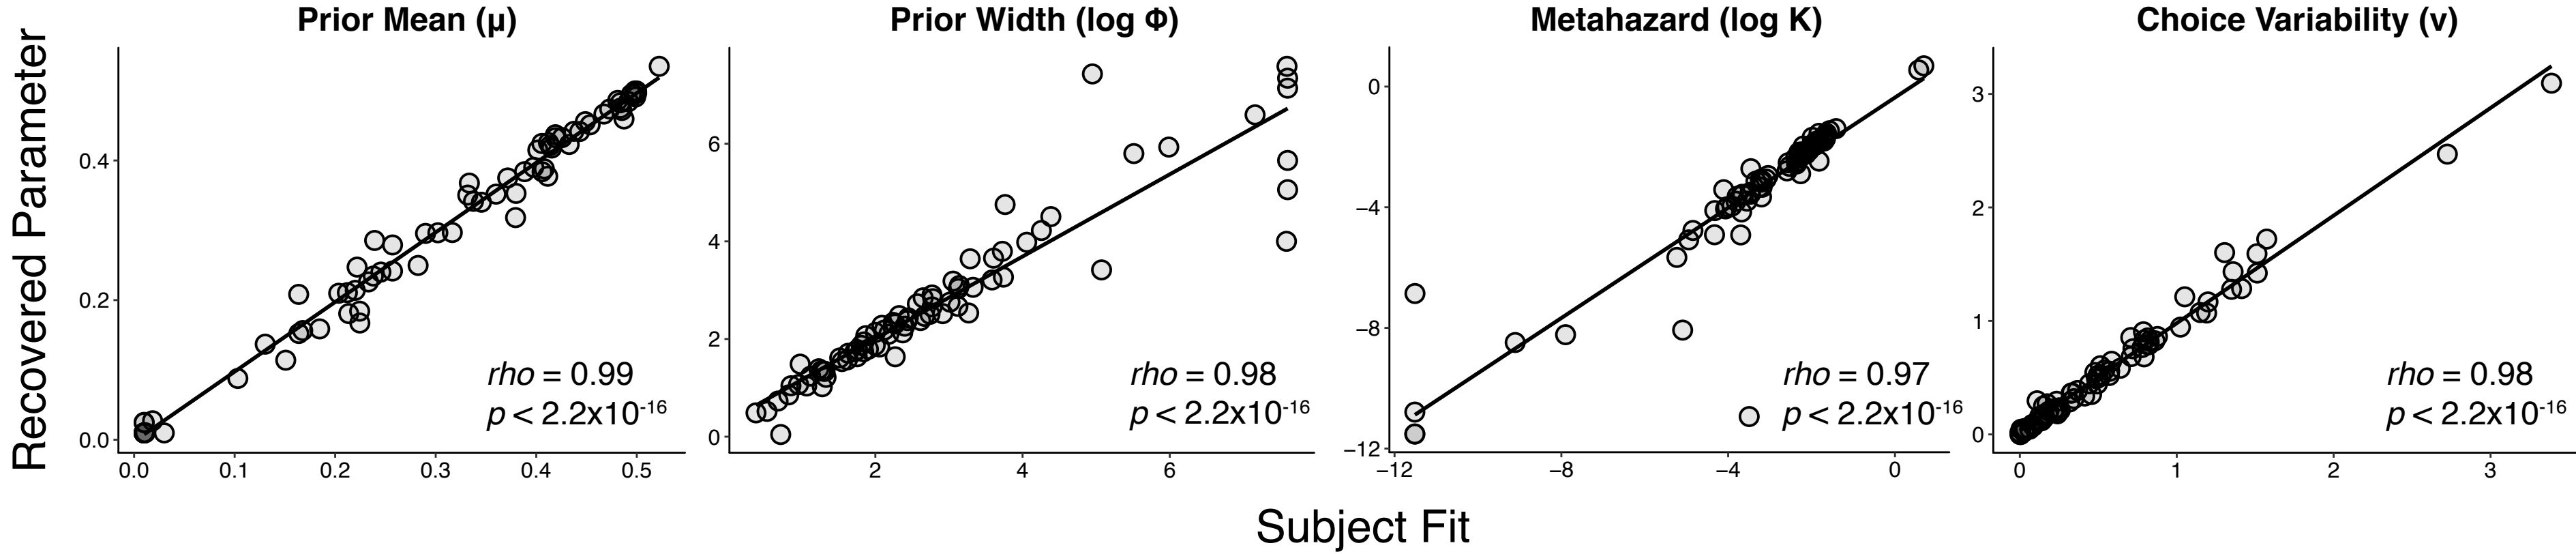

Supplement: supp [file elife_poa_e57872_Figure_4_figure_supplement_2.pdf › elife_poa_e57872_Figure_4_figure_supplement_2.pdf]
